# Supplementary material
Source: publisher figshare collection journal article supplement (https://acs.figshare.com/ndownloader/files/3750952)
Supplement: Supplementary file 1 [file 3750952]

 
data_0283b-1 
 
_audit_creation_method            SHELXL-97 
_chemical_name_systematic 
; 
 ? 
; 
_chemical_name_common             ? 
_chemical_melting_point           ? 
_chemical_formula_moiety           'C14 H12 O4'  
_chemical_formula_sum 
 'C14 H12 O4' 
_chemical_formula_weight          244.24 
 
loop_ 
 _atom_type_symbol 
 _atom_type_description 
 _atom_type_scat_dispersion_real 
 _atom_type_scat_dispersion_imag 
 _atom_type_scat_source 
 'C'  'C'   0.0033   0.0016 
 'International Tables Vol C Tables 4.2.6.8 and 6.1.1.4' 
 'H'  'H'   0.0000   0.0000 
 'International Tables Vol C Tables 4.2.6.8 and 6.1.1.4' 
 'O'  'O'   0.0106   0.0060 
 'International Tables Vol C Tables 4.2.6.8 and 6.1.1.4' 
 
_symmetry_cell_setting            Monoclinic
_symmetry_space_group_name_H-M    P2(1)/n
 
loop_ 
 _symmetry_equiv_pos_as_xyz 
 'x, y, z' 
 '-x+1/2, y+1/2, -z+1/2' 
 '-x, -y, -z' 
 'x-1/2, -y-1/2, z-1/2' 
 
_cell_length_a                    6.7673(10) 
_cell_length_b                    13.803(2) 
_cell_length_c                    12.1929(18) 
_cell_angle_alpha                 90.00 
_cell_angle_beta                  97.214(2) 
_cell_angle_gamma                 90.00 
_cell_volume                      1129.9(3) 
_cell_formula_units_Z             4 
_cell_measurement_temperature     120(2) 
_cell_measurement_reflns_used     18867
_cell_measurement_theta_min       2.24
_cell_measurement_theta_max       29.49
 
_exptl_crystal_description        'block'
_exptl_crystal_colour             'white'
_exptl_crystal_size_max           0.30 
_exptl_crystal_size_mid           0.21 
_exptl_crystal_size_min           0.16 
_exptl_crystal_density_meas       'not measured'
_exptl_crystal_density_diffrn     1.436 
_exptl_crystal_density_method     'not measured' 
_exptl_crystal_F_000              512 
_exptl_absorpt_coefficient_mu     0.106 
_exptl_absorpt_correction_type    'multi-scan'
_exptl_absorpt_correction_T_min   0.9690 
_exptl_absorpt_correction_T_max   0.9833 
_exptl_absorpt_process_details    'SADABS'
 
_exptl_special_details 
; 
 ? 
; 
 
_diffrn_ambient_temperature       120(2) 
_diffrn_radiation_wavelength      0.71073 
_diffrn_radiation_type            MoK\a 
_diffrn_radiation_source          'fine-focus sealed tube' 
_diffrn_radiation_monochromator   graphite 
_diffrn_measurement_device_type   'CCD area detector'
_diffrn_measurement_method        'phi and omega scans'
_diffrn_detector_area_resol_mean  ? 
_diffrn_reflns_number             18867 
_diffrn_reflns_av_R_equivalents   0.0217 
_diffrn_reflns_av_sigmaI/netI     0.0137 
_diffrn_reflns_limit_h_min        -8 
_diffrn_reflns_limit_h_max        9 
_diffrn_reflns_limit_k_min        -18 
_diffrn_reflns_limit_k_max        18 
_diffrn_reflns_limit_l_min        -16 
_diffrn_reflns_limit_l_max        16 
_diffrn_reflns_theta_min          2.24 
_diffrn_reflns_theta_max          29.49 
_reflns_number_total              2970 
_reflns_number_gt                 2667 
_reflns_threshold_expression      >2sigma(I) 
 
_computing_data_collection        'Bruker SMART'
_computing_cell_refinement        'Bruker SMART'
_computing_data_reduction         'Bruker SAINT'
_computing_structure_solution     'SHELXS-97 (Sheldrick, 2008)' 
_computing_structure_refinement   'SHELXL-97 (Sheldrick, 2008)' 
_computing_molecular_graphics     'Bruker SHELXTL'
_computing_publication_material   'Bruker SHELXTL' 
 
_refine_special_details 
; 
 Refinement of F^2^ against ALL reflections.  The weighted R-factor wR and 
 goodness of fit S are based on F^2^, conventional R-factors R are based 
 on F, with F set to zero for negative F^2^. The threshold expression of 
 F^2^ > 2sigma(F^2^) is used only for calculating R-factors(gt) etc. and is 
 not relevant to the choice of reflections for refinement.  R-factors based 
 on F^2^ are statistically about twice as large as those based on F, and R- 
 factors based on ALL data will be even larger. 
; 
 
_refine_ls_structure_factor_coef  Fsqd  
_refine_ls_matrix_type            full 
_refine_ls_weighting_scheme       calc  
_refine_ls_weighting_details 
 'calc w=1/[\s^2^(Fo^2^)+(0.0733P)^2^+0.2485P] where P=(Fo^2^+2Fc^2^)/3' 
_atom_sites_solution_primary      direct 
_atom_sites_solution_secondary    difmap 
_atom_sites_solution_hydrogens    geom 
_refine_ls_hydrogen_treatment     constr
_refine_ls_extinction_method      none 
_refine_ls_extinction_coef        ? 
_refine_ls_number_reflns          2970 
_refine_ls_number_parameters      164 
_refine_ls_number_restraints      0 
_refine_ls_R_factor_all           0.0418 
_refine_ls_R_factor_gt            0.0380 
_refine_ls_wR_factor_ref          0.1187 
_refine_ls_wR_factor_gt           0.1140 
_refine_ls_goodness_of_fit_ref    1.063 
_refine_ls_restrained_S_all       1.063 
_refine_ls_shift/su_max           0.001 
_refine_ls_shift/su_mean          0.000 
 
loop_ 
 _atom_site_label 
 _atom_site_type_symbol 
 _atom_site_fract_x 
 _atom_site_fract_y 
 _atom_site_fract_z 
 _atom_site_U_iso_or_equiv 
 _atom_site_adp_type 
 _atom_site_occupancy 
 _atom_site_symmetry_multiplicity 
 _atom_site_calc_flag 
 _atom_site_refinement_flags 
 _atom_site_disorder_assembly 
 _atom_site_disorder_group 
O1 O 0.87388(14) 0.62825(6) 0.20195(9) 0.0399(3) Uani 1 1 d . . . 
O2 O 1.31436(10) 0.48259(5) 0.07115(6) 0.02140(18) Uani 1 1 d . . . 
O3 O 0.40050(11) 0.52812(5) 0.37064(6) 0.02404(18) Uani 1 1 d . . . 
O4 O 0.31132(10) 0.37573(5) 0.40686(6) 0.01918(17) Uani 1 1 d . . . 
C1 C 1.01201(13) 0.47371(6) 0.16093(7) 0.01529(19) Uani 1 1 d . . . 
C2 C 1.00637(14) 0.58115(7) 0.16630(8) 0.0200(2) Uani 1 1 d . . . 
C3 C 1.17162(15) 0.62945(7) 0.12435(8) 0.0216(2) Uani 1 1 d . . . 
H3 H 1.1801 0.6981 0.1281 0.026 Uiso 1 1 calc R . . 
C4 C 1.31221(14) 0.58010(7) 0.08054(8) 0.0223(2) Uani 1 1 d . . . 
H4 H 1.4170 0.6157 0.0544 0.027 Uiso 1 1 calc R . . 
C5 C 1.16768(13) 0.43068(7) 0.11299(7) 0.01695(19) Uani 1 1 d . . . 
C6 C 1.18921(14) 0.33066(7) 0.10340(8) 0.0215(2) Uani 1 1 d . . . 
H6 H 1.2965 0.3044 0.0697 0.026 Uiso 1 1 calc R . . 
C7 C 1.05288(14) 0.27060(7) 0.14349(8) 0.0215(2) Uani 1 1 d . . . 
H7 H 1.0654 0.2023 0.1376 0.026 Uiso 1 1 calc R . . 
C8 C 0.89644(14) 0.31016(7) 0.19269(7) 0.01875(19) Uani 1 1 d . . . 
H8 H 0.8037 0.2679 0.2205 0.022 Uiso 1 1 calc R . . 
C9 C 0.87177(13) 0.41013(6) 0.20234(7) 0.01530(19) Uani 1 1 d . . . 
C10 C 0.70651(13) 0.44770(6) 0.25740(7) 0.01658(19) Uani 1 1 d . . . 
H10 H 0.6847 0.5157 0.2549 0.020 Uiso 1 1 calc R . . 
C11 C 0.58421(14) 0.39413(7) 0.31072(8) 0.0189(2) Uani 1 1 d . . . 
H11 H 0.5988 0.3257 0.3140 0.023 Uiso 1 1 calc R . . 
C12 C 0.42679(13) 0.44178(7) 0.36431(7) 0.01654(19) Uani 1 1 d . . . 
C13 C 0.15509(13) 0.41562(7) 0.46421(8) 0.0193(2) Uani 1 1 d . . . 
H13A H 0.0714 0.4607 0.4152 0.023 Uiso 1 1 calc R . . 
H13B H 0.2136 0.4517 0.5306 0.023 Uiso 1 1 calc R . . 
C14 C 0.03125(14) 0.33242(7) 0.49702(8) 0.0216(2) Uani 1 1 d . . . 
H14A H -0.0283 0.2982 0.4306 0.032 Uiso 1 1 calc R . . 
H14B H -0.0745 0.3572 0.5374 0.032 Uiso 1 1 calc R . . 
H14C H 0.1160 0.2877 0.5444 0.032 Uiso 1 1 calc R . . 
 
loop_ 
 _atom_site_aniso_label 
 _atom_site_aniso_U_11 
 _atom_site_aniso_U_22 
 _atom_site_aniso_U_33 
 _atom_site_aniso_U_23 
 _atom_site_aniso_U_13 
 _atom_site_aniso_U_12 
O1 0.0438(5) 0.0144(4) 0.0697(6) -0.0030(4) 0.0396(5) 0.0010(3) 
O2 0.0203(4) 0.0165(3) 0.0296(4) 0.0019(3) 0.0118(3) 0.0006(2) 
O3 0.0248(4) 0.0139(3) 0.0355(4) 0.0006(3) 0.0117(3) -0.0004(2) 
O4 0.0179(3) 0.0139(3) 0.0279(4) -0.0005(2) 0.0115(3) -0.0009(2) 
C1 0.0173(4) 0.0129(4) 0.0161(4) -0.0004(3) 0.0039(3) 0.0002(3) 
C2 0.0234(5) 0.0133(4) 0.0250(4) -0.0006(3) 0.0100(3) -0.0002(3) 
C3 0.0256(5) 0.0140(4) 0.0268(5) 0.0007(3) 0.0092(4) -0.0025(3) 
C4 0.0221(5) 0.0170(4) 0.0293(5) 0.0029(4) 0.0092(4) -0.0027(3) 
C5 0.0175(4) 0.0156(4) 0.0186(4) 0.0010(3) 0.0055(3) -0.0003(3) 
C6 0.0232(4) 0.0157(4) 0.0270(5) -0.0011(3) 0.0093(4) 0.0040(3) 
C7 0.0272(5) 0.0128(4) 0.0253(5) -0.0011(3) 0.0066(4) 0.0014(3) 
C8 0.0225(4) 0.0143(4) 0.0202(4) 0.0001(3) 0.0056(3) -0.0027(3) 
C9 0.0170(4) 0.0143(4) 0.0150(4) -0.0006(3) 0.0035(3) -0.0008(3) 
C10 0.0171(4) 0.0149(4) 0.0183(4) -0.0007(3) 0.0042(3) -0.0006(3) 
C11 0.0171(4) 0.0157(4) 0.0249(5) -0.0001(3) 0.0067(3) 0.0002(3) 
C12 0.0149(4) 0.0155(4) 0.0197(4) 0.0005(3) 0.0039(3) -0.0017(3) 
C13 0.0167(4) 0.0183(4) 0.0245(4) -0.0031(3) 0.0095(3) -0.0006(3) 
C14 0.0190(4) 0.0213(4) 0.0258(5) 0.0034(4) 0.0081(3) -0.0009(3) 
 
_geom_special_details 
; 
 All esds (except the esd in the dihedral angle between two l.s. planes) 
 are estimated using the full covariance matrix.  The cell esds are taken 
 into account individually in the estimation of esds in distances, angles 
 and torsion angles; correlations between esds in cell parameters are only 
 used when they are defined by crystal symmetry.  An approximate (isotropic) 
 treatment of cell esds is used for estimating esds involving l.s. planes. 
; 
 
loop_ 
 _geom_bond_atom_site_label_1 
 _geom_bond_atom_site_label_2 
 _geom_bond_distance 
 _geom_bond_site_symmetry_2 
 _geom_bond_publ_flag 
O1 C2 1.2303(12) . ? 
O2 C4 1.3511(12) . ? 
O2 C5 1.3734(11) . ? 
O3 C12 1.2089(12) . ? 
O4 C12 1.3464(10) . ? 
O4 C13 1.4477(10) . ? 
C1 C5 1.3995(12) . ? 
C1 C9 1.4305(12) . ? 
C1 C2 1.4851(13) . ? 
C2 C3 1.4493(13) . ? 
C3 C4 1.3350(13) . ? 
C3 H3 0.9500 . ? 
C4 H4 0.9500 . ? 
C5 C6 1.3948(13) . ? 
C6 C7 1.3749(13) . ? 
C6 H6 0.9500 . ? 
C7 C8 1.3922(13) . ? 
C7 H7 0.9500 . ? 
C8 C9 1.3966(12) . ? 
C8 H8 0.9500 . ? 
C9 C10 1.4693(12) . ? 
C10 C11 1.3377(13) . ? 
C10 H10 0.9500 . ? 
C11 C12 1.4728(12) . ? 
C11 H11 0.9500 . ? 
C13 C14 1.5052(12) . ? 
C13 H13A 0.9900 . ? 
C13 H13B 0.9900 . ? 
C14 H14A 0.9800 . ? 
C14 H14B 0.9800 . ? 
C14 H14C 0.9800 . ? 
 
loop_ 
 _geom_angle_atom_site_label_1 
 _geom_angle_atom_site_label_2 
 _geom_angle_atom_site_label_3 
 _geom_angle 
 _geom_angle_site_symmetry_1 
 _geom_angle_site_symmetry_3 
 _geom_angle_publ_flag 
C4 O2 C5 118.18(7) . . ? 
C12 O4 C13 115.02(7) . . ? 
C5 C1 C9 117.04(8) . . ? 
C5 C1 C2 117.84(8) . . ? 
C9 C1 C2 125.11(8) . . ? 
O1 C2 C3 120.69(9) . . ? 
O1 C2 C1 124.56(8) . . ? 
C3 C2 C1 114.75(8) . . ? 
C4 C3 C2 121.78(9) . . ? 
C4 C3 H3 119.1 . . ? 
C2 C3 H3 119.1 . . ? 
C3 C4 O2 123.92(8) . . ? 
C3 C4 H4 118.0 . . ? 
O2 C4 H4 118.0 . . ? 
O2 C5 C6 113.41(8) . . ? 
O2 C5 C1 123.42(8) . . ? 
C6 C5 C1 123.17(8) . . ? 
C7 C6 C5 119.02(8) . . ? 
C7 C6 H6 120.5 . . ? 
C5 C6 H6 120.5 . . ? 
C6 C7 C8 119.82(9) . . ? 
C6 C7 H7 120.1 . . ? 
C8 C7 H7 120.1 . . ? 
C7 C8 C9 121.95(8) . . ? 
C7 C8 H8 119.0 . . ? 
C9 C8 H8 119.0 . . ? 
C8 C9 C1 119.00(8) . . ? 
C8 C9 C10 119.54(8) . . ? 
C1 C9 C10 121.44(8) . . ? 
C11 C10 C9 125.44(8) . . ? 
C11 C10 H10 117.3 . . ? 
C9 C10 H10 117.3 . . ? 
C10 C11 C12 119.66(8) . . ? 
C10 C11 H11 120.2 . . ? 
C12 C11 H11 120.2 . . ? 
O3 C12 O4 123.08(8) . . ? 
O3 C12 C11 126.08(8) . . ? 
O4 C12 C11 110.84(8) . . ? 
O4 C13 C14 107.63(7) . . ? 
O4 C13 H13A 110.2 . . ? 
C14 C13 H13A 110.2 . . ? 
O4 C13 H13B 110.2 . . ? 
C14 C13 H13B 110.2 . . ? 
H13A C13 H13B 108.5 . . ? 
C13 C14 H14A 109.5 . . ? 
C13 C14 H14B 109.5 . . ? 
H14A C14 H14B 109.5 . . ? 
C13 C14 H14C 109.5 . . ? 
H14A C14 H14C 109.5 . . ? 
H14B C14 H14C 109.5 . . ? 
 
loop_ 
 _geom_torsion_atom_site_label_1 
 _geom_torsion_atom_site_label_2 
 _geom_torsion_atom_site_label_3 
 _geom_torsion_atom_site_label_4 
 _geom_torsion 
 _geom_torsion_site_symmetry_1 
 _geom_torsion_site_symmetry_2 
 _geom_torsion_site_symmetry_3 
 _geom_torsion_site_symmetry_4 
 _geom_torsion_publ_flag 
C5 C1 C2 O1 176.85(10) . . . . ? 
C9 C1 C2 O1 -4.01(15) . . . . ? 
C5 C1 C2 C3 -2.52(12) . . . . ? 
C9 C1 C2 C3 176.62(8) . . . . ? 
O1 C2 C3 C4 -176.84(10) . . . . ? 
C1 C2 C3 C4 2.56(14) . . . . ? 
C2 C3 C4 O2 0.02(16) . . . . ? 
C5 O2 C4 C3 -2.66(14) . . . . ? 
C4 O2 C5 C6 -177.25(8) . . . . ? 
C4 O2 C5 C1 2.56(13) . . . . ? 
C9 C1 C5 O2 -179.13(7) . . . . ? 
C2 C1 C5 O2 0.08(13) . . . . ? 
C9 C1 C5 C6 0.66(13) . . . . ? 
C2 C1 C5 C6 179.87(8) . . . . ? 
O2 C5 C6 C7 179.24(8) . . . . ? 
C1 C5 C6 C7 -0.57(14) . . . . ? 
C5 C6 C7 C8 0.01(14) . . . . ? 
C6 C7 C8 C9 0.43(14) . . . . ? 
C7 C8 C9 C1 -0.32(13) . . . . ? 
C7 C8 C9 C10 -178.57(8) . . . . ? 
C5 C1 C9 C8 -0.21(12) . . . . ? 
C2 C1 C9 C8 -179.35(8) . . . . ? 
C5 C1 C9 C10 178.01(8) . . . . ? 
C2 C1 C9 C10 -1.14(13) . . . . ? 
C8 C9 C10 C11 7.18(14) . . . . ? 
C1 C9 C10 C11 -171.03(9) . . . . ? 
C9 C10 C11 C12 178.74(8) . . . . ? 
C13 O4 C12 O3 -1.72(12) . . . . ? 
C13 O4 C12 C11 178.34(7) . . . . ? 
C10 C11 C12 O3 -4.14(14) . . . . ? 
C10 C11 C12 O4 175.80(8) . . . . ? 
C12 O4 C13 C14 175.10(7) . . . . ? 
 
_diffrn_measured_fraction_theta_max    0.943 
_diffrn_reflns_theta_full              25.00 
_diffrn_measured_fraction_theta_full   0.999 
_refine_diff_density_max    0.382 
_refine_diff_density_min   -0.260 
_refine_diff_density_rms    0.048 
